# Supplementary material for: Targeting of CXCR3 improves anti-myeloma efficacy of adoptively transferred activated natural killer cells
Source: PubMed Central journal article supplement (PMC6839099; doi:10.1186/s40425-019-0751-5), 2019-11-07

**Figure S5**

**A**

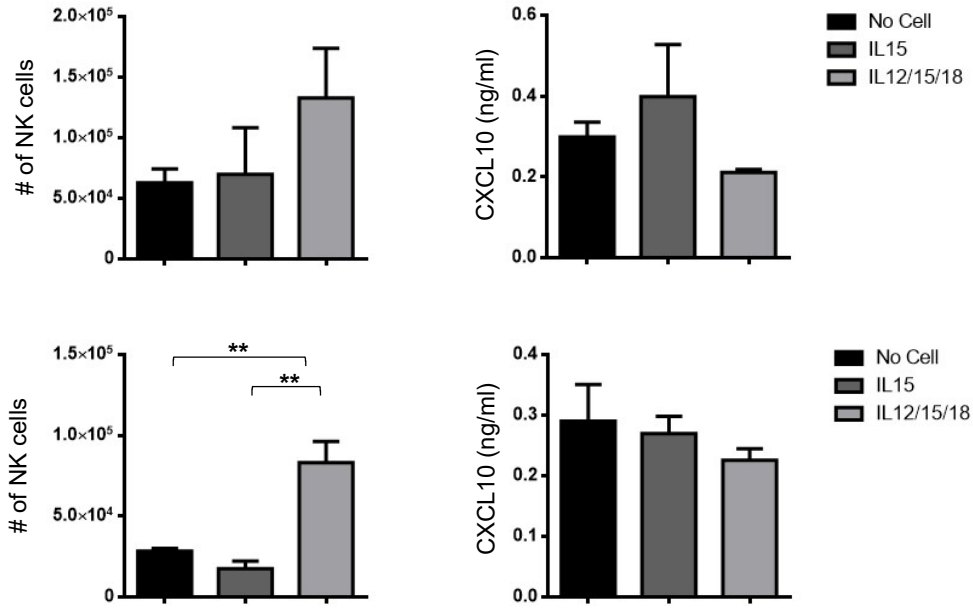

**B**

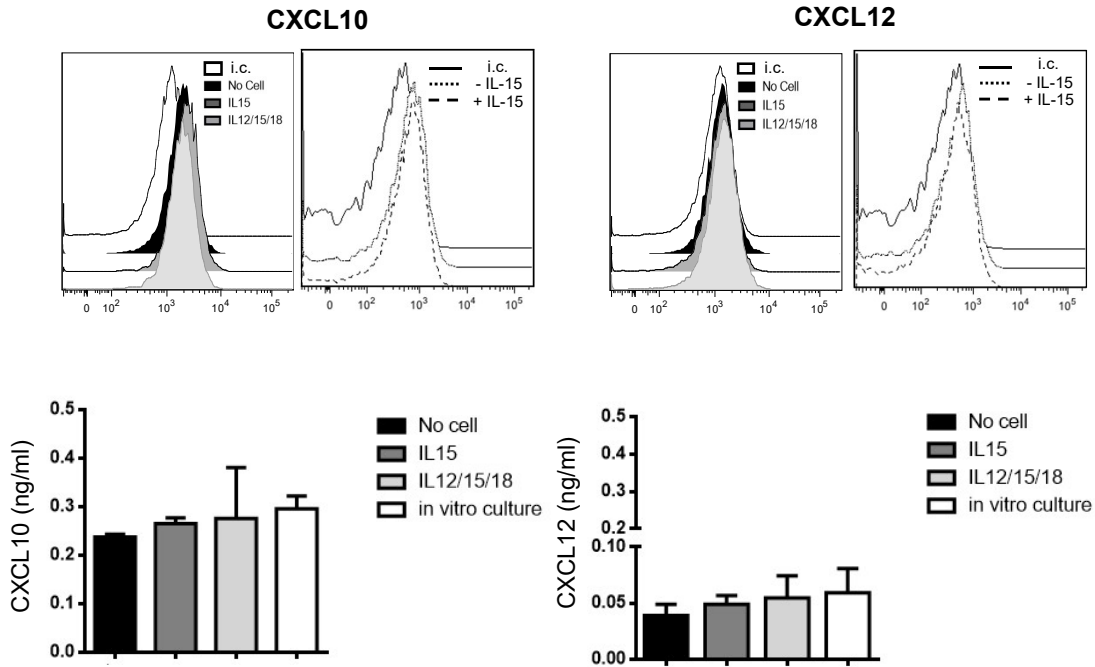

Supplement: 40425_2019_751_MOESM6_ESM.pdf [file 40425_2019_751_MOESM6_ESM.pdf]
